# Supplementary material
Source: PubMed Central journal article supplement (PMC4319685)
Supplement: es505156q_si_001.pdf [file es505156q_si_001.pdf]

## SUPPORTING INFORMATION

### **Nontargeted biomonitoring of halogenated organic compounds in two ecotypes of bottlenose dolphins (*Tursiops truncatus*) from the Southern California Bight**

Nellie J. Shaul<sup>†,‡</sup>, Nathan G. Dodder<sup>§</sup>, Lihini I. Aluwihare<sup>†,‡</sup>, Susan A. Mackintosh<sup>†,||,⊥</sup>, Keith A. Maruya<sup>§</sup>, Susan J. Chivers<sup>#</sup>, Kerri Danil<sup>#</sup>, David W. Weller<sup>#</sup>, Eunha Hoh<sup>\*,†,||</sup>

<sup>†</sup>Center for Oceans and Human Health, Scripps Institution of Oceanography, University of California-San Diego, La Jolla, California, USA

<sup>‡</sup>Scripps Institution of Oceanography, University of California, San Diego, 9500 Gilman Drive, La Jolla, CA 92037, USA

<sup>§</sup>Southern California Coastal Water Research Project Authority, 3535 Harbor Boulevard, Suite 110, Costa Mesa, CA 92626, USA

<sup>||</sup>Graduate School of Public Health, San Diego State University, 5500 Campanile Drive, San Diego, CA 92182, USA

<sup>⊥</sup>San Diego State University Research Foundation, 5250 Campanile Drive, San Diego, CA 92182, USA

<sup>#</sup>Marine Mammal & Turtle Division, Southwest Fisheries Science Center, National Marine Fisheries Service, National Oceanic and Atmospheric Administration, 8901 La Jolla Shores Dr., La Jolla, CA, 92037, USA

Number of Pages (including cover page): 33

Number of Tables: 5

Number of Figures: 8

| <b>Table of Contents</b>                                                                 | <b>Page</b> |
|------------------------------------------------------------------------------------------|-------------|
| <b>Glossary of Acronyms</b>                                                              | 4           |
| <b>Materials and Methods</b>                                                             | 4           |
| <i>Materials</i>                                                                         | 6           |
| <i>Sample Preparation</i>                                                                | 7           |
| <i>Instrumental Analysis</i>                                                             | 8           |
| <i>Compound Identification</i>                                                           | 9           |
| <i>Ecotype Clustering</i>                                                                | 10          |
| <b>References</b>                                                                        | 12          |
| <b>Figure S1.</b> GC×GC chromatogram of a representative dolphin blubber extract.        | 13          |
| <b>Figure S2.</b> Hierarchical clustering results for the anthropogenic compounds.       | 14          |
| <b>Figure S3.</b> Hierarchical clustering results for the natural compounds.             | 15          |
| <b>Figure S4.</b> Hierarchical clustering results for the unknown compounds.             | 16          |
| <b>Figure S5.</b> Principal components analysis results for the anthropogenic compounds. | 17          |
| <b>Figure S6.</b> Principal components analysis results for the natural compounds.       | 18          |
| <b>Figure S7.</b> Principal components analysis results for the unknown compounds.       | 19          |
| <b>Figure S8.</b> Abundance of the chlordanes.                                           | 20          |
| <b>Table S1.</b> Normalized abundances and frequency of detection for each compound.     | 21          |
| <b>Table S2.</b> K-means clustering results for the anthropogenic compounds.             | 32          |

|                                                                        |    |
|------------------------------------------------------------------------|----|
| <b>Table S3.</b> K-means clustering results for the natural compounds. | 32 |
| <b>Table S4.</b> K-means clustering results for the unknown compounds. | 32 |
| <b>Table S5.</b> Stranding and morphometric information.               | 33 |

## Glossary of Acronyms

2'-MeO-BDE-68: 2'-methoxy-2,3',4,5'-tetrabrominated diphenyl ether

6-MeO-BDE-47: 6-methoxy-2,2',4,4'-tetrabrominated diphenyl ether

6'-MeO-BDE-99: 6'-methoxy-2,2',4,4',5-pentabromodiphenyl ether

B/CDE: brominated/chlorinated diphenyl ether

BDE: brominated diphenyl ether

*o,p'*-DDD: *o,p'*-dichlorodiphenyldichloroethane

*p,p'*-DDD: *p,p'*-dichlorodiphenyldichloroethane

DDE: dichlorobis(chlorophenyl)ethene

DDMU: chlorobis(chlorophenyl)ethene

DDT: dichlorodiphenyltrichloroethane

di-MeO-PBB-80: 2,2'-dimethoxy-3,3',5,5'-tetrabromobiphenyl

DMBP: 1,1'-dimethyl-2,2'-bipyrroles

EI: electron ionization

eV: electron volts

GC×GC: comprehensive two-dimensional gas chromatography

GPC: gel permeation chromatography

HOC: halogenated organic compound

MBP: 1'-methyl-1,2'-bipyrrole

MeO-B/CDE: methoxy brominated/chlorinated diphenyl ether

MeO-BDE: methoxy brominated diphenyl ether

MeO-CDE: methoxy chlorinated diphenyl ether

MS: mass spectra

NIST: National Institute of Standards and Technology

NOAA: National Oceanic and Atmospheric Administration

OH-PBDE: hydroxy polybrominated diphenyl ether

OH-PCB: hydroxy polychlorinated biphenyl

PBDE: polybrominated diphenyl ether

PBDF: polybrominated dibenzofuran

PBHD: polybrominated hexahydroanthene derivative

PCB: polychlorinated biphenyl

PCDE: polychlorinated diphenyl ether

PCT: polychlorinated terphenyl

RT: retention time

S/N: signal-to-noise ratio

TCPM: tris(chlorophenyl)methane

TCPMOH: tris(chlorophenyl)methanol

TOF-MS: time-of-flight mass spectrometry

## Materials and Methods

### Materials

All of the solvents used for the extraction and cleanup procedures were residue-analysis grade.

The following reference standards were purchased from AccuStandard (New Haven, CT, USA):

3,3',4,4'-tetrabromodiphenyl ether (BDE-077S); 2,3,4,4',5,6-hexabromodiphenyl ether (BDE-166S); 6-fluoro-2,2',4,4'-tetrabromodiphenyl ether (FBDE-4003S); 4'-fluoro-2,3,3',4,5,6-hexabromodiphenyl ether (FBDE-6001S); organochlorine pesticide mixture containing  $\alpha$ -BHC,  $\beta$ -BHC, heptachlor epoxide,  $\gamma$ -Chlordane,  $\alpha$ -Chlordane, trans-Nonachlor, and cis-Nonachlor (M-680P); *p,p'*-DDMU (P-424S); PBDEs Standard Solution for Accuracy and Precision (BDE-AAP-A); hexabrominated biphenyl, PBB-153 (B-153S); Methylsulfonyl pentachlorinated biphenyl, 3-MeO-Sulfonyl-PCB-101 (MSCB-3101); Methoxylated bromodiphenyl ethers, 2'-MeO BDE-68 (MOBDE-4006S-0.2X), 6-MeO BDE-47 (MOBDE-4005S-0.2X), 6'-MeO BDE-99 (MOBDE-5006S-0.2X); 1,2,4-Trichlorobenzene (P-1004S); 1,2,3,4-Tetrachlorobenzene (P-999S); Pentachlorobenzene (APP-9-173); 2,2',4,5',5'-Tetrabromobiphenyl (B-049SS); 2,2',5,5'-Tetrabromobiphenyl; 2,2',4,5,5'-Pentabromobiphenyl (B-101S); chlordane (technical grade, APP-9-037); and DDT (technical grade, P-346N). The following reference standards were purchased from Wellington Laboratories (Guelph, Canada): 3,3',4,4',5,5'-hexachloro[<sup>13</sup>C<sub>12</sub>]biphenyl (MBP-169), 2,3,3',4,4',5,5'-heptachloro[<sup>13</sup>C<sub>12</sub>]biphenyl (MBP-189), Tris(4-chlorophenyl)methane (T4CPM); and Tris(4-chlorophenyl)methanol (T4CPME). A custom pesticide standard was purchased from Ultra Scientific (N. Kingstown, RI, USA) containing Mirex, *o,p'*-DDD, *p,p'*-DDD, and hexachlorobenzene. 5H-bromoindole; 2,4,6-tribromoanisole; tris(2-chloroethyl phosphate); and 4,4'-Dichlorobenzophenone were purchased from Sigma-Aldrich (Milwaukee, WI, USA). 4,6-Dibromoindole was purchased from SiNova

(Bethesda, MD, USA). 2,2'-Dimethoxy-3,3',5,5'-tetrabromobiphenyl, 2MeO-BB-80, was synthesized following the procedure described by Marsh et al. (2005).<sup>S1</sup> Polybrominated hexahydroanthene standards were donated by Walter Vetter. All DMBP and MBP reference standards were synthesized by methods modified from Wu et al. (2002)<sup>S2</sup> in William Fenical's lab, except for MBP-C17, which was synthesized according to Wu et al. (2002).<sup>S2</sup>

### ***Sample Preparation***

Samples were randomly labeled 1-8 prior to extraction and analysis to eliminate analytical bias, and ecotype assignment was blinded until all halogenated organic compounds (HOCs) were identified. Approximately 2 g of blubber was homogenized, ground with kilned Na<sub>2</sub>SO<sub>4</sub> and extracted by pressurized fluid extraction (Dionex ASE 300, Dionex, Sunnyvale, CA, USA) with dichloromethane (100 °C, 1500 psi). It was previously found that removal of lipids by gel permeation chromatography (GPC) only, as opposed to acidification or GPC in combination with silica-gel chromatography, resulted in the maximum number of detected compounds.<sup>S3</sup>

Approximately 1 g of extracted blubber ("oil") was dissolved in 4.7 mL of 1:1 ethyl acetate/cyclohexane and spiked with a known amount of internal standard mixture (BDE 77, <sup>13</sup>C<sub>12</sub>-PCB 169). The solution was injected into a GPC system (J2 Scientific, Columbia, MO) to remove lipids based on a previously validated method that maximized recovery of several HOC classes.<sup>S4</sup> The GPC column, with a 2-cm i.d. and length of 22.5 cm, was packed with 24 g of BioBeads S-X3 in 1:1 ethyl acetate/cyclohexane. The flow rate was 5 mL/min, and the mobile phase was 1:1 ethyl acetate/cyclohexane. The eluent fraction between 8.5 and 20.5 min was collected and reduced to 1 mL under N<sub>2</sub> gas. The extract was brought to 4.7 mL with the mobile-phase solvent and re-injected into the GPC system to remove residual lipids. The extract was

then evaporated and solvent-exchanged to isooctane in a final volume of 50  $\mu\text{L}$ . Fifty microliters of a recovery standard mixture of known concentration (6F-tetraBDE, 4F-hexaBDE,  $^{13}\text{C}_{12}$ -PCB 189) was then added to bring the extracts to a final volume of 100  $\mu\text{L}$  prior to injection on a GC $\times$ GC/TOF-MS.

### ***Instrumental Analysis***

Sample extracts were analyzed on a Pegasus 4D GC $\times$ GC/TOF-MS (LECO, St. Joseph, MI, USA) connected to an Agilent 6890 gas chromatograph (Palo Alto, CA, USA) with a secondary oven, a split/splitless injector, and a non-moving quad-jet dual stage modulator. The first-dimension (1D) column was a Restek (Bellefonte, PA) Rtx5Sil-MS (30-m length, 0.25-mm i.d., 0.25- $\mu\text{m}$  film thickness) and was integrated with 5 m of guard column. A Restek Rtx17Sil-MS (1-m length, 0.10-mm i.d., 0.10- $\mu\text{m}$  film thickness) was the second-dimension (2D) column. A 2- $\mu\text{L}$  splitless sample injection was conducted using an Agilent autosampler (Santa Clara, CA) at 300  $^{\circ}\text{C}$ . Research grade helium (Airgas, Radnor, PA) was used as the carrier gas at 1 mL/min. The primary oven temperature was held at 60  $^{\circ}\text{C}$  for 1 min, ramped at 10  $^{\circ}\text{C}/\text{min}$  to 300  $^{\circ}\text{C}$  and held for 3 min, and ramped at 20  $^{\circ}\text{C}/\text{min}$  to 320  $^{\circ}\text{C}$  and held for 20 min. The secondary oven temperature was programmed to be 20  $^{\circ}\text{C}$  higher than the primary oven temperature. For GC $\times$ GC, the modulation period was set to 3.5 s, with a 0.9 s hot pulse duration and a 35  $^{\circ}\text{C}$  modulator temperature offset versus the primary oven temperature. The MS transfer line and ion source temperatures were 285  $^{\circ}\text{C}$  and 250  $^{\circ}\text{C}$ , respectively. Fragmentation occurred by electron ionization (EI), with an electron energy of  $-70$  eV and a detector voltage of 1600 V. The data acquisition rate was 150 spectra/s.



### ***Compound Identification***

Data processing for the nontargeted analysis included automatic peak finding using mass spectral deconvolution (within ChromaTOF) and spectral searching versus mass spectral libraries at a signal-to-noise threshold (S/N) of 10 or higher for the first sample analyzed (selected at random). The two mass spectral libraries used were the NIST 2011 EI mass spectral library and a previously established custom mass spectral library for HOCs identified in an Atlantic dolphin blubber sample.<sup>S5</sup> Identification through spectral searching was based on the common presence of characteristic identifiable fragment ions (often halogenated isotopic clusters) and the spectral similarity score. All PCB congeners and oversaturated DDT and DDE peaks were excluded from identification. Initially in this first sample, 326 peaks were identified as potential HOCs of interest at S/N 10 out of 17,038 total peaks.

These HOC peaks were then used to create a reference standard data processing method that searched the remaining seven samples for the 326 HOCs found in sample 1 (S/N 50), matching based on retention time and spectral similarity. This method also searched ‘new’ peaks equal or above S/N 50 and within a retention time deviation of the modulation time,  $\pm 3.5$  s in 1<sup>st</sup> GC and  $\pm 0.05$  s in 2<sup>nd</sup> GC. This resulted in a list of peaks for samples 2-8 that either matched to peaks in the reference standard (i.e., sample 1) or represented ‘new’ peaks that were not of similar spectra/retention time as those selected from sample 1. Reference standard matches for the compounds from sample 1 were confirmed in these remaining seven samples, and ‘new’ peak spectra were scrutinized for any HOCs different from those in sample 1. This resulted in a total of 395 unique HOCs from eight dolphin samples. As a final confirmation, a second reference standard data processing method containing these 395 peaks was created and used to process all

eight samples again (S/N 50). Hits to these 395 peaks were then confirmed. The final library resulted from further curation and scrutiny of these peaks (e.g., compounds identified as different isomers in different samples determined to be the same compound) and ultimately consisted of 327 unique compounds.

Compounds in the final library were ranked based on the degree of identification following previously defined categories in Hoh et al. (2012),<sup>S5</sup> with the category names found in the library in brackets: “(1) The experimental mass spectrum and retention times were matched to those of a reference standard analyzed under the same conditions [authentic MS RT]. (2) The experimental spectrum, but not the retention times, was matched to a reference standard, indicating the experimental spectrum is that of an isomer [authentic MS]. (3) The experimental spectrum was matched to one within the NIST Electron Ionization Mass Spectral Library [reference database MS]. (4) The experimental spectrum was matched to one found in the literature [literature MS]. (5) The experimental mass spectrum was identified as potentially belonging to a class of congeners on the basis of comparison to that of a reference standard within the same class of congeners [manual-congener group]. (6) A presumptive identification was made by manual interpretation of the experimental spectrum [manual]. (7) The experimental spectrum was identified as belonging to a halogenated compound, but the chemical structure could not be further identified [unknown].”

### ***Ecotype Clustering***

Differences in compound profiles between the coastal and offshore ecotypes were assessed using three methods: hierarchical clustering (using R function hclust) displayed as a heatmap

(Supplemental Material, Figures S2-S4), *k*-means clustering (R function `kmeans`) with two centers specified (Supplemental Material, Tables S2-S4), and principal components analysis (PCA, R function `prcomp`, Figures S5-S7). PCA plot symbols were encoded using the two clusters identified by the *k*-means clustering, and labeled by ecotype. Anthropogenic, natural, and unknown compounds were analyzed separately because we hypothesized the sources may vary spatially and impact the two ecotypes differently (with anthropogenic sources primarily along the coast). Prior to analysis, the concentration data, with non-detects set at zero, was log transformed as  $\log_{10}(x+1)$ , where  $x$  was the normalized abundance. We concluded there was a difference between coastal and offshore ecotype contaminant profiles only if all three methods identified two sample clusters corresponding to the two ecotypes.

## References

- S1. Marsh, G.; Athanasiadou, M.; Athanassiadis, I.; Bergman, A.; Endo, T.; Haraguchi, K. Identification, quantification, and synthesis of a novel dimethoxylated polybrominated biphenyl in marine mammals caught off the coast of Japan. *Environ. Sci. Technol.* **2005**, *39*, 8684-8690.
- S2. Wu, J.; Vetter, W.; Gribble, G.W.; Schneekloth, J.S.; Blank, D.H.; Gorls, H. Structure and synthesis of the natural heptachloro-1'-methyl-1,2'-bipyrrole (Q1). *Angew. Chem. Int. Edit.* **2002**, *41*, 1740-1743.
- S3. Hoh, E.; Lehotay, S.J.; Mastovska, K.; Ngo, H.L.; Vetter, W. Capabilities of direct sample introduction-comprehensive two-dimensional gas chromatography-time-of-flight mass spectrometry to analyze organic chemicals of interest in fish oils. *Environ. Sci. Technol.* **2009**, *57*, 2653–2660.
- S4. Hoh, E.; Lehotay, S.J.; Mastovska, K.; Huwe, J.K. Evaluation of automated direct sample introduction with comprehensive two-dimensional gas chromatography/time-of-flight mass spectrometry for the screening analysis of dioxins in fish oil. *J. Chromatogr. A* **2008**, *1201*, 69–77.
- S5. Hoh, E.; Dodder, N.G.; Lehotay, S.J.; Pangallo, K.C.; Reddy, C.M.; Maruya, K.A. Nontargeted Comprehensive Two-Dimensional Gas Chromatography/Time-of-Flight Mass Spectrometry Method and Software for Inventorying Persistent and Bioaccumulative Contaminants in Marine Environments. *Environ. Sci. Technol.* **2012**, *46*, 8001-8008.

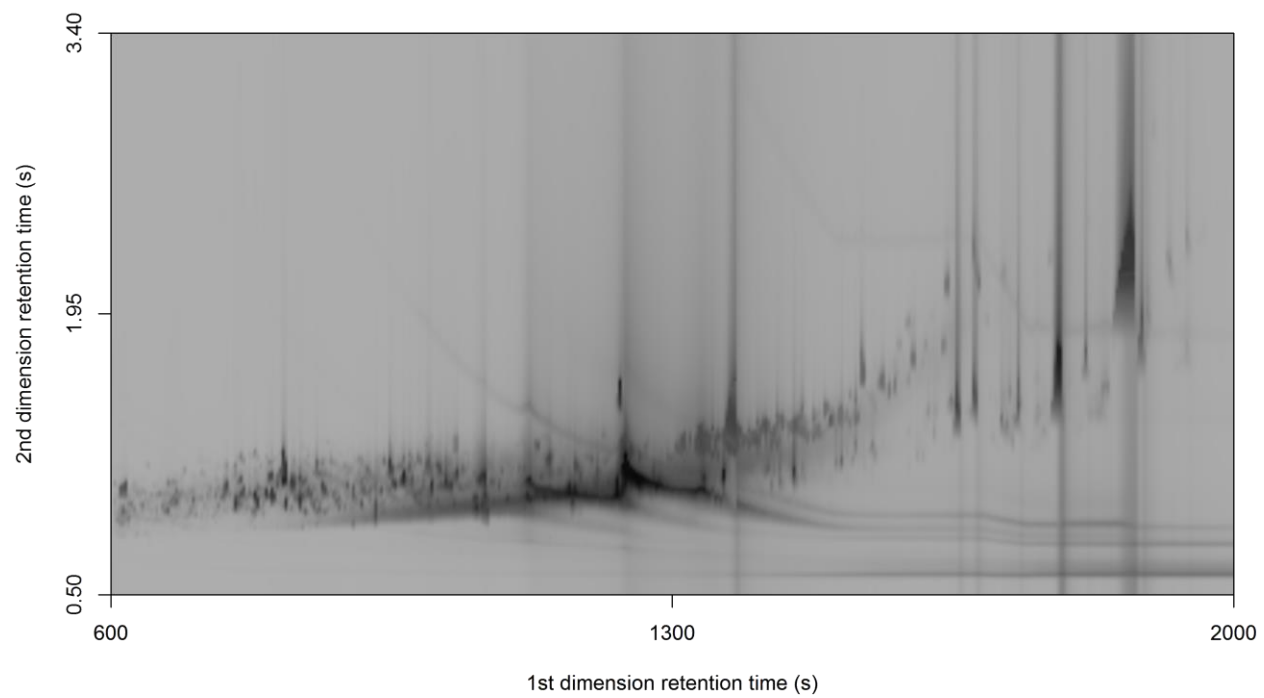

**Figure S1.** Representative GC×GC chromatogram of a dolphin blubber extract.

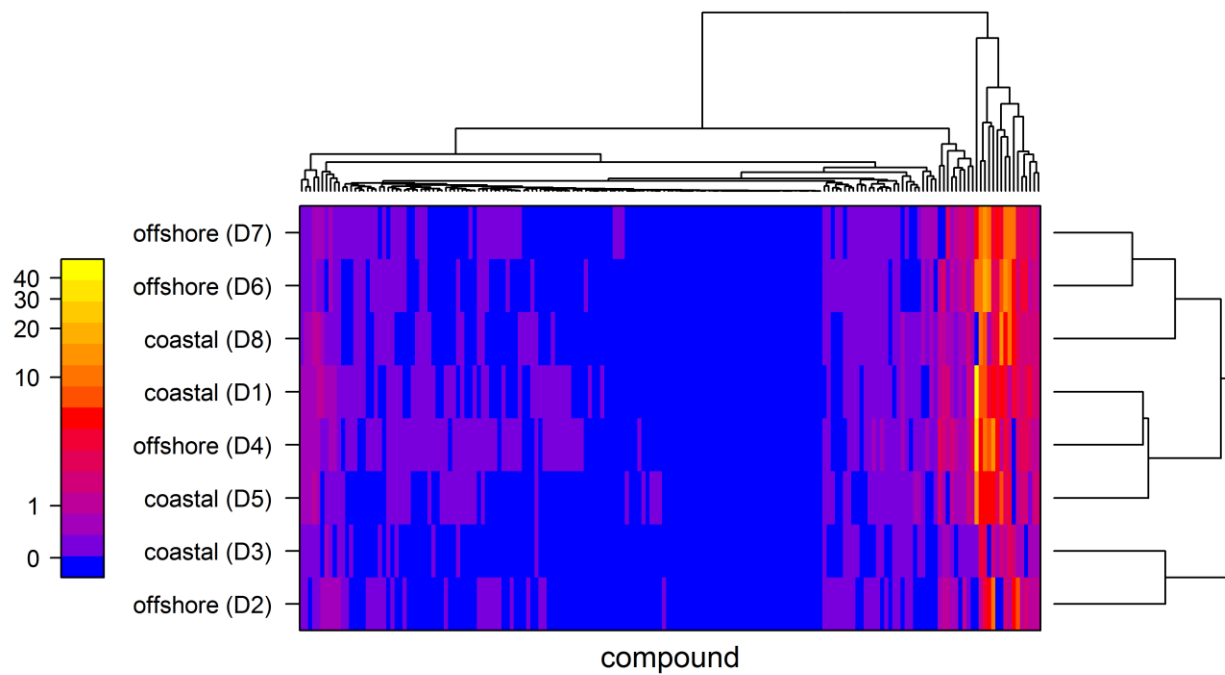

**Figure S2.** Hierarchical clustering results for the anthropogenic compounds. The color key indicates the normalized compound abundance and the dendrograms indicate the clustering results. Each compound has at least one detect among the eight samples, although some compounds with low abundance were binned as having apparent values of zero.

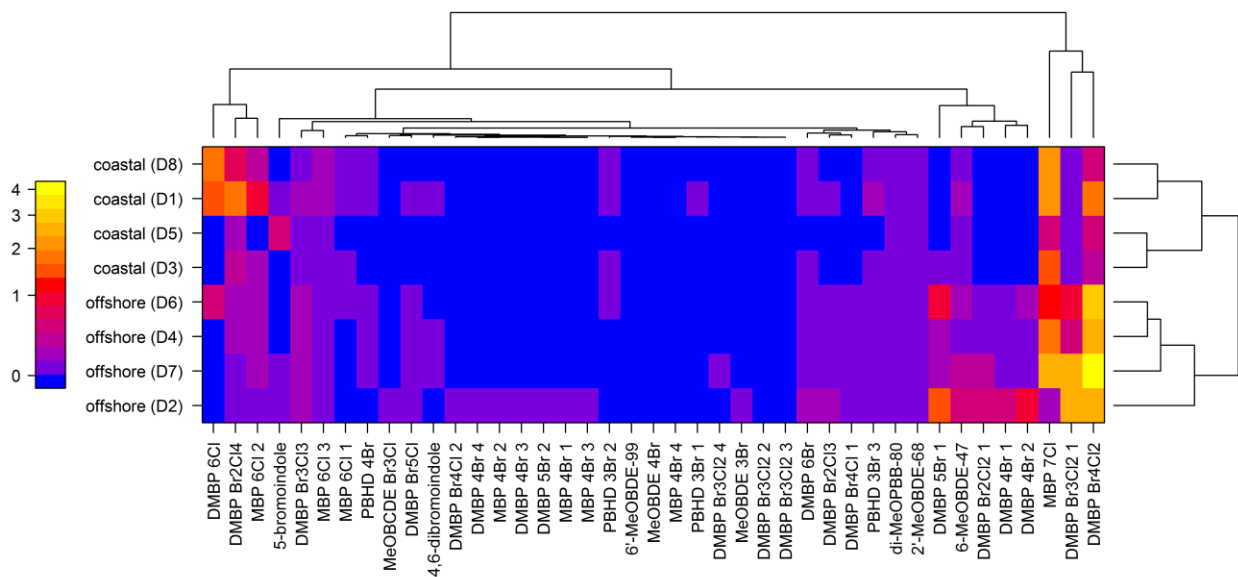

**Figure S3.** Hierarchical clustering results for the natural compounds. The color key indicates the normalized compound abundance and the dendrograms indicate the clustering results. Each compound has at least one detect among the eight samples, although some compounds with low abundance were binned as having apparent values of zero.

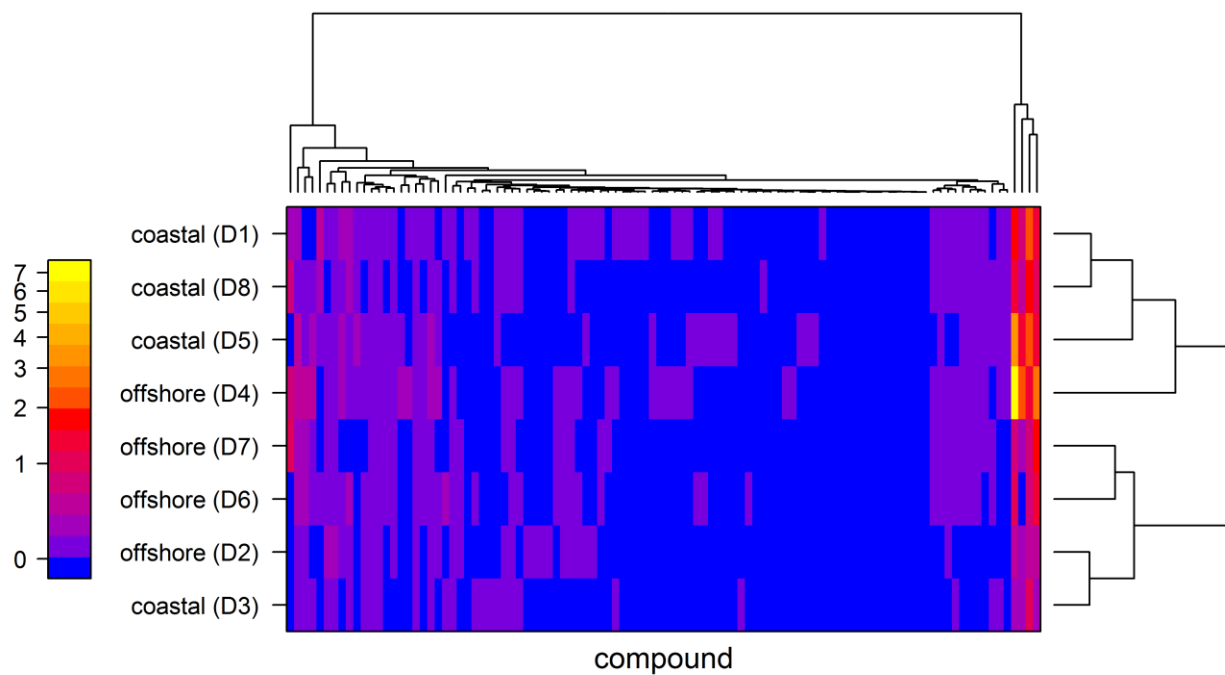

**Figure S4.** Hierarchical clustering results for the unknown compounds. The color key indicates the normalized compound abundance and the dendrograms indicate the clustering results. Each compound has at least one detect among the eight samples, although some compounds with low abundance were binned as having apparent values of zero.



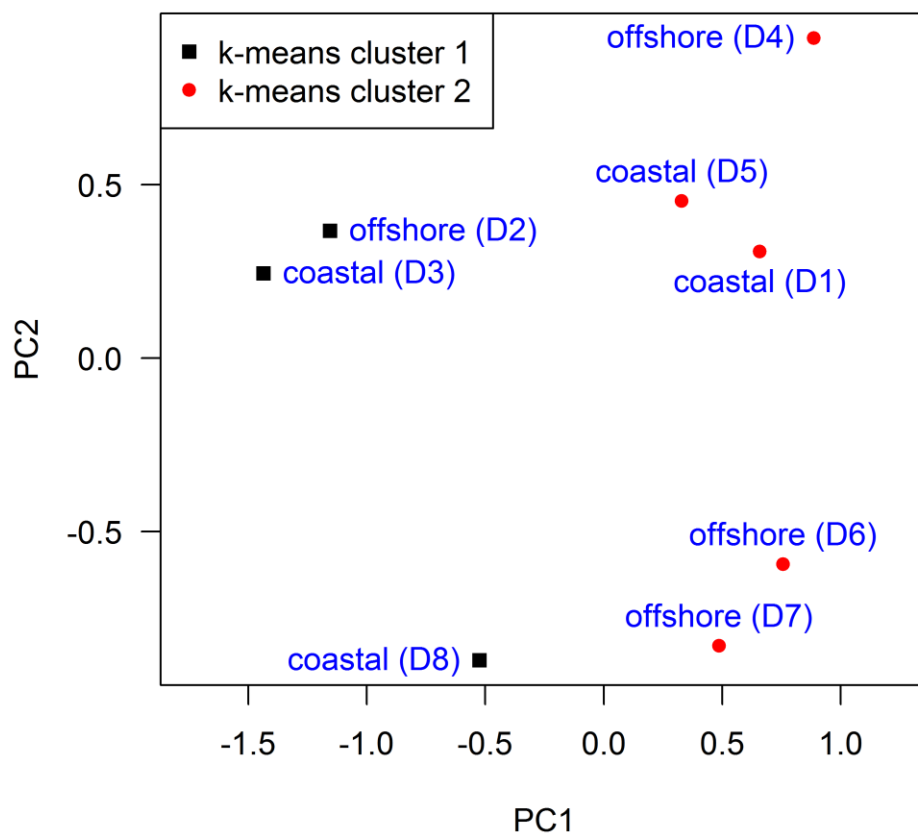

**Figure S5.** Principal components analysis results for the anthropogenic compounds. Together, the first two principal components (PC1 and PC2) represented 68% of the variance.

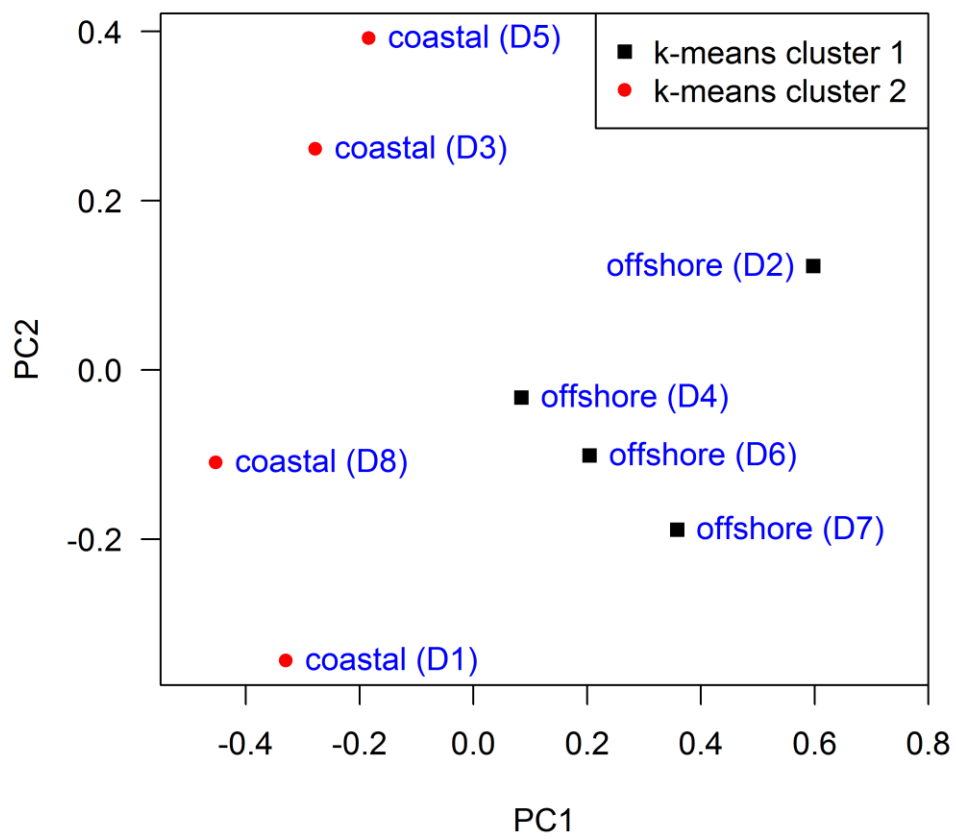

**Figure S6.** Principal components analysis results for the natural compounds. Together, PC1 and PC2 represented 81% of the variance.

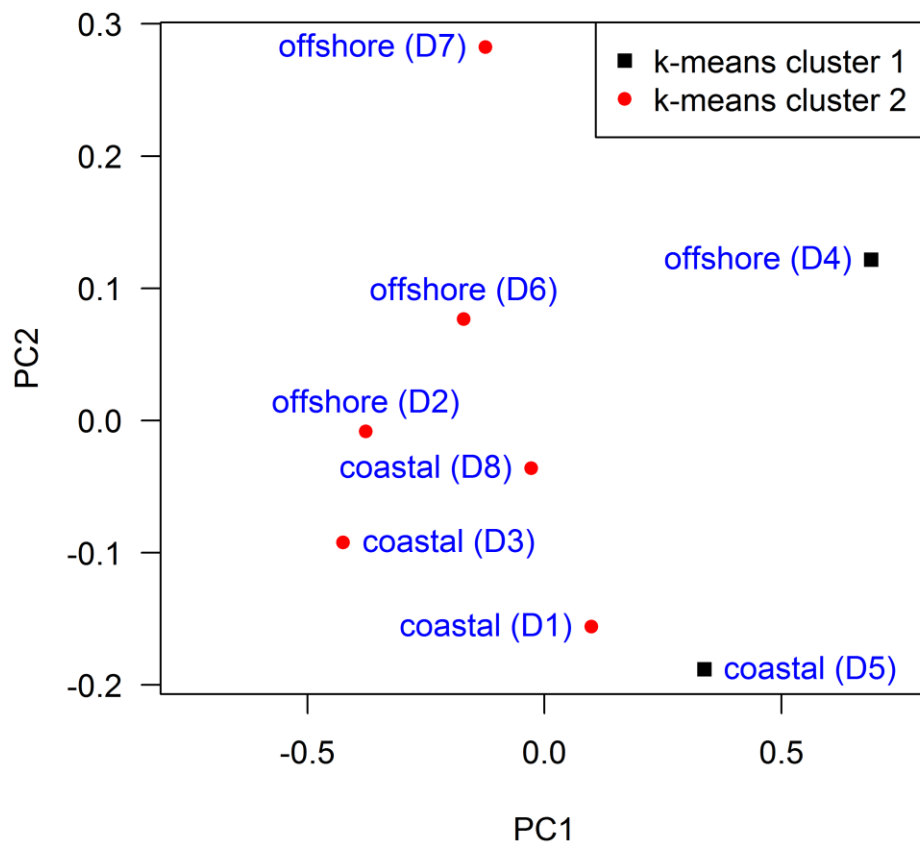

**Figure S7.** Principal components analysis results for the unknown compounds. Together, PC1 and PC2 represented 84% of the variance.

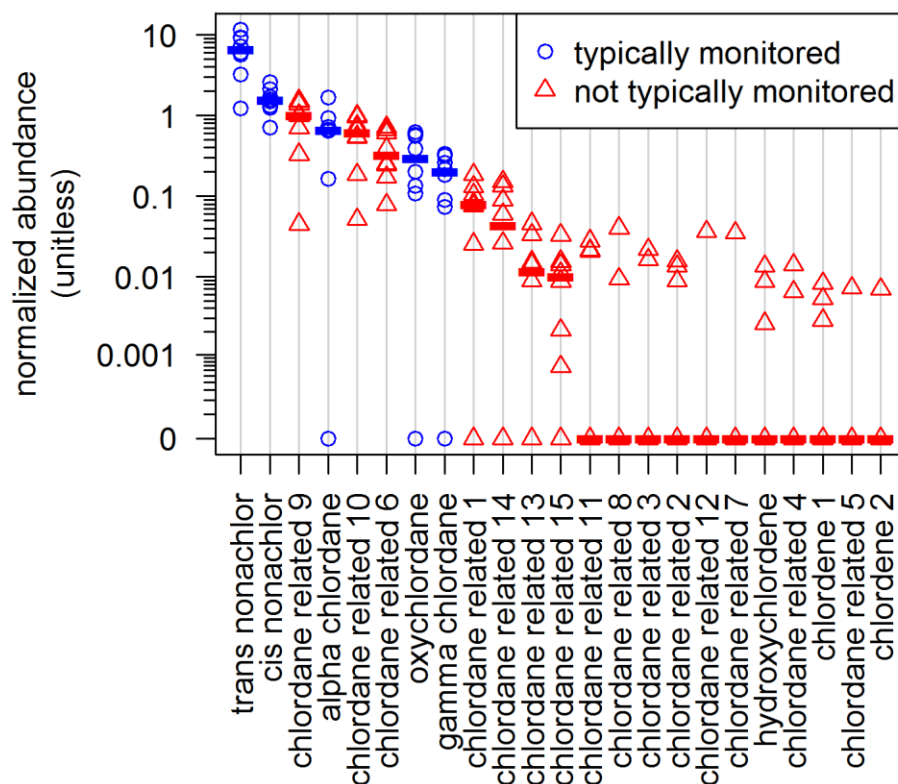

**Figure S8.** Abundance (normalized peak area) of the chlordane compounds. Each point represents a single dolphin blubber sample (n = 8). The line is the median abundance. Compounds along the x-axis are sorted by median abundance. The monitoring status of each chlordane is shown in the legend. Non-detects are shown with a value of zero (multiple non-detects overlap). Note the three unmonitored chlordanes with similar abundance to the typically monitored chlordanes: chlordane related 9 (page 13 in the mass spectral library), chlordane related 10 (page 15), and chlordane related 6 (page 10).

**Table S1.** Mean and median normalized abundances and frequency of detection for all individual compounds (alphabetical order by class, then compound).

| Compound               | Compound Class      | Mean Area | Median Area | Frequency | Identification        |
|------------------------|---------------------|-----------|-------------|-----------|-----------------------|
| PBCDE Br3Cl 1          | B/CDE               | 0.0095    | 0.0078      | 5         | Manual-Congener Group |
| PBCDE Br3Cl 2          | B/CDE               | 0.015     | 0.017       | 5         | Manual-Congener Group |
| PBCDE Br3Cl 3          | B/CDE               | 0.015     | 0.015       | 6         | Manual-Congener Group |
| 2,4,6-tribromo anisole | Brominated anisole  | 0.038     | 0.042       | 8         | Authentic MS RT       |
| 4,6-dibromoindole      | Brominated indole   | 0.023     | 0.02        | 4         | Authentic MS RT       |
| 5-bromoindole          | Brominated indole   | 0.093     | 0.015       | 7         | Authentic MS RT       |
| bromomethyl biphenyl   | Bromomethylbiphenyl | 0.022     | 0.015       | 4         | Reference Database MS |
| alpha chlordane        | Chlordane-related   | 0.78      | 0.67        | 7         | Authentic MS RT       |
| chlordane related 1    | Chlordane-related   | 0.098     | 0.082       | 7         | Manual                |
| chlordane related 10   | Chlordane-related   | 0.59      | 0.62        | 8         | Manual-Congener Group |
| chlordane related 11   | Chlordane-related   | 0.024     | 0.022       | 3         | Manual-Congener Group |
| chlordane related 12   | Chlordane-related   | 0.037     | 0.037       | 1         | Manual-Congener Group |
| chlordane related 13   | Chlordane-related   | 0.024     | 0.015       | 5         | Manual-Congener Group |
| chlordane related 14   | Chlordane-related   | 0.093     | 0.09        | 5         | Manual-Congener Group |
| chlordane related 15   | Chlordane-related   | 0.012     | 0.011       | 7         | Literature MS         |
| chlordane related 2    | Chlordane-related   | 0.013     | 0.014       | 3         | Reference Database MS |
| chlordane related 3    | Chlordane-related   | 0.019     | 0.019       | 2         | Manual-Congener Group |
| chlordane related 4    | Chlordane-related   | 0.01      | 0.01        | 2         | Manual-Congener Group |
| chlordane related 5    | Chlordane-related   | 0.0072    | 0.0072      | 1         | Manual-Congener Group |
| chlordane related 6    | Chlordane-related   | 0.39      | 0.32        | 8         | Manual-Congener Group |
| chlordane related 7    | Chlordane-related   | 0.035     | 0.035       | 1         | Manual-Congener Group |
| chlordane related 8    | Chlordane-related   | 0.025     | 0.025       | 2         | Manual-Congener Group |
| chlordane related 9    | Chlordane-related   | 0.94      | 1           | 8         | Manual-Congener Group |
| chlordene 1            | Chlordane-related   | 0.0055    | 0.0053      | 3         | Reference Database MS |
| chlordene 2            | Chlordane-related   | 0.007     | 0.007       | 1         | Reference Database MS |
| cis nonachlor          | Chlordane-related   | 1.6       | 1.6         | 8         | Authentic MS RT       |
| gamma chlordane        | Chlordane-related   | 0.21      | 0.22        | 7         | Authentic MS RT       |
| hydroxychlordene       | Chlordane-related   | 0.0083    | 0.0088      | 3         | Reference Database MS |
| oxychlordane           | Chlordane-related   | 0.37      | 0.39        | 7         | Reference Database MS |

|                              |                     |        |        |   |                       |
|------------------------------|---------------------|--------|--------|---|-----------------------|
| trans nonachlor              | Chlordane-related   | 6.7    | 6.6    | 8 | Authentic MS RT       |
| 1,2,3,4-tetrachlorobenzene   | Chlorinated benzene | 0.041  | 0.025  | 5 | Authentic MS RT       |
| 1,2,4-trichlorobenzene       | Chlorinated benzene | 0.12   | 0.079  | 3 | Authentic MS RT       |
| hexachlorobenzene            | Chlorinated benzene | 2.3    | 2      | 8 | Authentic MS RT       |
| pentachlorobenzene           | Chlorinated benzene | 0.081  | 0.049  | 4 | Authentic MS RT       |
| chlorinated PAH              | Chlorinated PAH     | 0.0017 | 0.0017 | 2 | Authentic MS          |
| ethenyl benzene 3Cl          | Chlorinated styrene | 0.052  | 0.048  | 5 | Reference Database MS |
| polychlorinated styrene 7Cl  | Chlorinated styrene | 0.019  | 0.02   | 8 | Authentic MS          |
| chlorobenzaldehyde           | Chlorobenzaldehyde  | 0.046  | 0.044  | 7 | Reference Database MS |
| tris(2-chloroethyl)phosphate | Chlorophosphate     | 0.013  | 0.0095 | 4 | Authentic MS RT       |
| DDMU 1                       | DDT-related         | 0.19   | 0.21   | 6 | Authentic MS          |
| DDMU 2                       | DDT-related         | 0.73   | 0.53   | 8 | Authentic MS          |
| DDMU 3                       | DDT-related         | 7      | 5.8    | 7 | Authentic MS RT       |
| DDMU 4                       | DDT-related         | 0.15   | 0.16   | 6 | Authentic MS          |
| DDT related 1                | DDT-related         | 0.016  | 0.016  | 7 | Reference Database MS |
| DDT related 10               | DDT-related         | 0.051  | 0.054  | 6 | Reference Database MS |
| DDT related 11               | DDT-related         | 0.29   | 0.18   | 5 | Manual                |
| DDT related 12               | DDT-related         | 0.43   | 0.42   | 7 | Reference Database MS |
| DDT related 13               | DDT-related         | 6.1    | 5.7    | 7 | Reference Database MS |
| DDT related 14               | DDT-related         | 0.085  | 0.045  | 3 | Manual-Congener Group |
| DDT related 15               | DDT-related         | 0.055  | 0.055  | 2 | Manual-Congener Group |
| DDT related 16               | DDT-related         | 0.023  | 0.023  | 1 | Manual-Congener Group |
| DDT related 17               | DDT-related         | 0.044  | 0.04   | 4 | Manual-Congener Group |
| DDT related 18               | DDT-related         | 0.045  | 0.039  | 8 | Manual-Congener Group |
| DDT related 19               | DDT-related         | 0.033  | 0.031  | 5 | Manual-Congener Group |
| DDT related 2                | DDT-related         | 0.077  | 0.072  | 6 | Reference Database MS |
| DDT related 20               | DDT-related         | 0.12   | 0.094  | 8 | Manual-Congener Group |
| DDT related 21               | DDT-related         | 0.1    | 0.098  | 4 | Manual                |
| DDT related 22               | DDT-related         | 0.15   | 0.1    | 7 | Manual                |
| DDT related 23               | DDT-related         | 0.023  | 0.016  | 8 | Manual-Congener Group |
| DDT related 3                | DDT-related         | 1.3    | 1.2    | 8 | Reference Database MS |
| DDT related 4                | DDT-related         | 0.094  | 0.12   | 5 | Reference Database MS |

|                           |                      |        |        |   |                       |
|---------------------------|----------------------|--------|--------|---|-----------------------|
| DDT related 5             | DDT-related          | 0.031  | 0.016  | 3 | Reference Database MS |
| DDT related 6             | DDT-related          | 0.036  | 0.024  | 5 | Reference Database MS |
| DDT related 7             | DDT-related          | 0.061  | 0.026  | 6 | Reference Database MS |
| DDT related 8             | DDT-related          | 0.048  | 0.044  | 6 | Reference Database MS |
| DDT related 9             | DDT-related          | 0.022  | 0.023  | 6 | Reference Database MS |
| o,p'-DDD                  | DDT-related          | 5.1    | 4.9    | 6 | Authentic MS RT       |
| p,p'-DDD                  | DDT-related          | 5.9    | 4.6    | 8 | Authentic MS RT       |
| 4,4'-dichlorobenzophenone | Dichlorobenzophenone | 3.4    | 3.8    | 7 | Authentic MS RT       |
| DMBP 4Br 1                | DMBP                 | 0.17   | 0.073  | 4 | Authentic MS          |
| DMBP 4Br 2                | DMBP                 | 0.23   | 0.087  | 6 | Authentic MS          |
| DMBP 4Br 3                | DMBP                 | 0.011  | 0.0032 | 3 | Authentic MS RT       |
| DMBP 4Br 4                | DMBP                 | 0.019  | 0.019  | 1 | Authentic MS RT       |
| DMBP 5Br 1                | DMBP                 | 0.36   | 0.11   | 8 | Authentic MS RT       |
| DMBP 5Br 2                | DMBP                 | 0.009  | 0.0033 | 3 | Authentic MS RT       |
| DMBP 6Br                  | DMBP                 | 0.047  | 0.021  | 8 | Authentic MS RT       |
| DMBP 6Cl                  | DMBP                 | 1.2    | 1.5    | 3 | Authentic MS RT       |
| DMBP Br2Cl2 1             | DMBP                 | 0.15   | 0.06   | 7 | Manual-Congener Group |
| DMBP Br2Cl3               | DMBP                 | 0.048  | 0.036  | 7 | Manual-Congener Group |
| DMBP Br2Cl4               | DMBP                 | 0.44   | 0.18   | 8 | Authentic MS RT       |
| DMBP Br3Cl2 1             | DMBP                 | 0.82   | 0.36   | 8 | Authentic MS RT       |
| DMBP Br3Cl2 2             | DMBP                 | 0.0032 | 0.0044 | 6 | Authentic MS          |
| DMBP Br3Cl2 3             | DMBP                 | 0.0034 | 0.0032 | 6 | Authentic MS          |
| DMBP Br3Cl2 4             | DMBP                 | 0.0064 | 0.0068 | 4 | Authentic MS          |
| DMBP Br3Cl3               | DMBP                 | 0.13   | 0.15   | 8 | Authentic MS RT       |
| DMBP Br4Cl 1              | DMBP                 | 0.05   | 0.033  | 4 | Authentic MS RT       |
| DMBP Br4Cl 2              | DMBP                 | 0.012  | 0.0048 | 4 | Authentic MS RT       |
| DMBP Br4Cl2               | DMBP                 | 1.9    | 2.2    | 8 | Authentic MS RT       |
| DMBP Br5Cl                | DMBP                 | 0.021  | 0.016  | 8 | Authentic MS RT       |
| alpha BHC                 | HCH-related          | 0.13   | 0.13   | 8 | Authentic MS RT       |
| beta BHC                  | HCH-related          | 1.6    | 1.6    | 8 | Authentic MS RT       |
| cyclohexene 4Cl 1         | HCH-related          | 0.057  | 0.043  | 5 | Reference Database MS |
| cyclohexene 4Cl 2         | HCH-related          | 0.015  | 0.02   | 5 | Reference Database MS |

|                              |                              |        |        |   |                       |
|------------------------------|------------------------------|--------|--------|---|-----------------------|
| heptachlor epoxide           | Heptachlor-related           | 0.52   | 0.42   | 8 | Authentic MS RT       |
| heptachlor related 1         | Heptachlor-related           | 0.026  | 0.028  | 3 | Manual                |
| heptachlor related 2         | Heptachlor-related           | 0.043  | 0.048  | 8 | Manual-Congener Group |
| heptachlor related 3         | Heptachlor-related           | 0.17   | 0.18   | 3 | Manual-Congener Group |
| MBP 4Br 1                    | MBP                          | 0.012  | 0.012  | 2 | Manual-Congener Group |
| MBP 4Br 2                    | MBP                          | 0.011  | 0.011  | 2 | Manual-Congener Group |
| MBP 4Br 3                    | MBP                          | 0.023  | 0.023  | 1 | Manual-Congener Group |
| MBP 4Br 4                    | MBP                          | 0.0043 | 0.0043 | 1 | Manual-Congener Group |
| MBP 6Cl 1                    | MBP                          | 0.027  | 0.027  | 6 | Authentic MS          |
| MBP 6Cl 2                    | MBP                          | 0.31   | 0.22   | 7 | Authentic MS          |
| MBP 6Cl 3                    | MBP                          | 0.11   | 0.12   | 8 | Authentic MS          |
| MBP 7Cl                      | MBP                          | 1.4    | 1.5    | 8 | Authentic MS RT       |
| MeOB/CDE Br3Cl               | MeO-B/CDE                    | 0.059  | 0.059  | 1 | Manual-Congener Group |
| 2'-MeOBDE-68                 | MeO-BDE                      | 0.037  | 0.037  | 8 | Authentic MS RT       |
| 6-MeOBDE-47                  | MeO-BDE                      | 0.21   | 0.16   | 8 | Authentic MS RT       |
| 6'-MeOBDE-99                 | MeO-BDE                      | 0.0022 | 0.0022 | 2 | Authentic MS RT       |
| MeOBDE 3Br                   | MeO-BDE                      | 0.0043 | 0.0037 | 7 | Authentic MS          |
| MeOBDE 4Br                   | MeO-BDE                      | 0.0026 | 0.0016 | 4 | Authentic MS          |
| MeOCDE 8Cl 1                 | MeO-CDE                      | 0.016  | 0.0073 | 3 | Manual-Congener Group |
| MeOCDE 8Cl 2                 | MeO-CDE                      | 0.012  | 0.0092 | 7 | Manual-Congener Group |
| di-MeOPBB-80                 | MeO-PBB                      | 0.055  | 0.052  | 8 | Authentic MS RT       |
| methylenebistrichloroanisole | Methylenebistrichloroanisole | 0.63   | 0.59   | 7 | Reference Database MS |
| methylsulfonylPCB 5Cl 1      | Methylsulfonyl-PCB           | 0.027  | 0.028  | 4 | Authentic MS          |
| methylsulfonylPCB 5Cl 2      | Methylsulfonyl-PCB           | 0.049  | 0.037  | 5 | Authentic MS          |
| methylsulfonylPCB 5Cl 3      | Methylsulfonyl-PCB           | 0.013  | 0.0084 | 4 | Authentic MS          |
| methylsulfonylPCB 6Cl 1      | Methylsulfonyl-PCB           | 0.0062 | 0.0068 | 3 | Authentic MS          |
| methylsulfonylPCB 6Cl 2      | Methylsulfonyl-PCB           | 0.0048 | 0.0049 | 3 | Authentic MS          |
| methylsulfonylPCB-101        | Methylsulfonyl-PCB           | 0.16   | 0.094  | 7 | Authentic MS RT       |
| mirex                        | Mirex-related                | 1.3    | 1.3    | 7 | Authentic MS RT       |
| mirex 1Cl                    | Mirex-related                | 0.061  | 0.045  | 7 | Manual-Congener Group |
| mirex 2Cl 1                  | Mirex-related                | 0.093  | 0.063  | 4 | Manual-Congener Group |
| mirex 2Cl 2                  | Mirex-related                | 0.038  | 0.035  | 7 | Manual-Congener Group |



|                     |               |         |         |   |                       |
|---------------------|---------------|---------|---------|---|-----------------------|
| mirex related 1     | Mirex-related | 0.21    | 0.18    | 4 | Manual                |
| BB 4Br 1            | PBB           | 0.13    | 0.094   | 8 | Manual-Congener Group |
| BB 4Br 2            | PBB           | 0.0041  | 0.004   | 7 | Manual-Congener Group |
| BB 4Br 3            | PBB           | 0.0018  | 0.0018  | 2 | Manual-Congener Group |
| BB 5Br 1            | PBB           | 0.00016 | 0.00016 | 1 | Manual-Congener Group |
| BB 5Br 2            | PBB           | 0.036   | 0.022   | 8 | Manual-Congener Group |
| BB 5Br 3            | PBB           | 0.0058  | 0.0058  | 1 | Manual-Congener Group |
| BB 5Br 4            | PBB           | 0.0024  | 0.0019  | 3 | Manual-Congener Group |
| BB 6Br 1            | PBB           | 0.0033  | 0.0022  | 3 | Authentic MS          |
| BB 6Br 2            | PBB           | 0.0013  | 0.0013  | 1 | Authentic MS          |
| BB-101              | PBB           | 0.03    | 0.026   | 8 | Authentic MS RT       |
| BB-153              | PBB           | 0.1     | 0.077   | 6 | Authentic MS RT       |
| BB-49               | PBB           | 0.028   | 0.029   | 4 | Authentic MS RT       |
| BB-52               | PBB           | 0.059   | 0.057   | 7 | Authentic MS RT       |
| BDE 2Br 1           | PBDE          | 0.01    | 0.0088  | 6 | Authentic MS          |
| BDE 3Br 1           | PBDE          | 0.01    | 0.01    | 6 | Authentic MS          |
| BDE 3Br 2           | PBDE          | 0.081   | 0.07    | 8 | Authentic MS          |
| BDE 4Br 1           | PBDE          | 0.018   | 0.0032  | 7 | Authentic MS          |
| BDE 5Br 1           | PBDE          | 0.041   | 0.043   | 8 | Authentic MS          |
| BDE-100             | PBDE          | 2.1     | 2.1     | 8 | Authentic MS RT       |
| BDE-116             | PBDE          | 0.0056  | 0.0047  | 7 | Authentic MS RT       |
| BDE-153             | PBDE          | 0.069   | 0.069   | 8 | Authentic MS RT       |
| BDE-154             | PBDE          | 0.29    | 0.26    | 8 | Authentic MS RT       |
| BDE-155             | PBDE          | 0.049   | 0.053   | 8 | Authentic MS RT       |
| BDE-17/25           | PBDE          | 0.0057  | 0.0044  | 6 | Authentic MS RT       |
| BDE-28/33           | PBDE          | 0.31    | 0.25    | 7 | Authentic MS RT       |
| BDE-47              | PBDE          | 5       | 3.5     | 8 | Authentic MS RT       |
| BDE-49              | PBDE          | 0.15    | 0.12    | 8 | Authentic MS RT       |
| BDE-66              | PBDE          | 0.061   | 0.051   | 8 | Authentic MS RT       |
| BDE-75              | PBDE          | 0.038   | 0.037   | 5 | Authentic MS RT       |
| BDE-99              | PBDE          | 1.2     | 0.99    | 8 | Authentic MS RT       |
| dibromobenzofuran 1 | PBDF          | 0.014   | 0.013   | 8 | Authentic MS          |

|                     |      |        |        |   |                       |
|---------------------|------|--------|--------|---|-----------------------|
| dibromobenzofuran 2 | PBDF | 0.0066 | 0.0062 | 4 | Authentic MS          |
| PBHD 3Br 1          | PBHD | 0.0062 | 0.0066 | 5 | Authentic MS          |
| PBHD 3Br 2          | PBHD | 0.01   | 0.01   | 7 | Authentic MS          |
| PBHD 3Br 3          | PBHD | 0.078  | 0.067  | 7 | Authentic MS RT       |
| PBHD 4Br            | PBHD | 0.024  | 0.02   | 8 | Authentic MS RT       |
| terphenyl 4Cl 1     | PCT  | 0.017  | 0.017  | 2 | Literature MS         |
| terphenyl 4Cl 2     | PCT  | 0.027  | 0.027  | 2 | Literature MS         |
| terphenyl 4Cl 3     | PCT  | 0.01   | 0.0055 | 3 | Literature MS         |
| terphenyl 4Cl 4     | PCT  | 0.022  | 0.013  | 4 | Literature MS         |
| terphenyl 4Cl 5     | PCT  | 0.12   | 0.095  | 6 | Literature MS         |
| terphenyl 4Cl 6     | PCT  | 0.13   | 0.093  | 8 | Literature MS         |
| terphenyl 4Cl 7     | PCT  | 0.025  | 0.025  | 4 | Literature MS         |
| terphenyl 4Cl 8     | PCT  | 0.025  | 0.016  | 5 | Literature MS         |
| terphenyl 4Cl 9     | PCT  | 0.069  | 0.068  | 8 | Literature MS         |
| terphenyl 5Cl 1     | PCT  | 0.05   | 0.015  | 5 | Manual-Congener Group |
| terphenyl 5Cl 2     | PCT  | 0.037  | 0.037  | 1 | Manual-Congener Group |
| terphenyl 5Cl 3     | PCT  | 0.018  | 0.018  | 1 | Manual-Congener Group |
| terphenyl 5Cl 4     | PCT  | 0.025  | 0.023  | 6 | Manual-Congener Group |
| terphenyl 5Cl 5     | PCT  | 0.049  | 0.023  | 8 | Manual-Congener Group |
| terphenyl 5Cl 6     | PCT  | 0.063  | 0.042  | 3 | Manual-Congener Group |
| terphenyl 6Cl 1     | PCT  | 0.0017 | 0.0017 | 2 | Manual-Congener Group |
| terphenyl 6Cl 2     | PCT  | 0.0063 | 0.0063 | 2 | Manual-Congener Group |
| terphenyl 6Cl 3     | PCT  | 0.0058 | 0.0054 | 4 | Manual-Congener Group |
| terphenyl 6Cl 4     | PCT  | 0.003  | 0.003  | 2 | Manual-Congener Group |
| terphenyl 6Cl 5     | PCT  | 0.0085 | 0.0085 | 2 | Manual-Congener Group |
| terphenyl 6Cl 6     | PCT  | 0.0077 | 0.0097 | 3 | Manual-Congener Group |
| terphenyl 6Cl 7     | PCT  | 0.012  | 0.012  | 2 | Manual-Congener Group |
| terphenyl 6Cl 8     | PCT  | 0.0041 | 0.0041 | 1 | Manual-Congener Group |
| terphenyl 7Cl 1     | PCT  | 0.0034 | 0.0035 | 4 | Manual-Congener Group |
| terphenyl 7Cl 2     | PCT  | 0.018  | 0.016  | 5 | Manual-Congener Group |
| terphenyl 7Cl 3     | PCT  | 0.011  | 0.0083 | 3 | Manual-Congener Group |
| terphenyl 7Cl 4     | PCT  | 0.0058 | 0.0058 | 2 | Manual-Congener Group |

|                                      |                              |        |        |   |                       |
|--------------------------------------|------------------------------|--------|--------|---|-----------------------|
| terphenyl 7Cl 5                      | PCT                          | 0.011  | 0.011  | 2 | Manual-Congener Group |
| terphenyl 7Cl 6                      | PCT                          | 0.014  | 0.013  | 4 | Manual-Congener Group |
| terphenyl 7Cl 7                      | PCT                          | 0.012  | 0.011  | 4 | Manual-Congener Group |
| terphenyl 7Cl 8                      | PCT                          | 0.0067 | 0.0067 | 2 | Manual-Congener Group |
| terphenyl 7Cl 9                      | PCT                          | 0.0059 | 0.0052 | 4 | Manual-Congener Group |
| terphenyl 8Cl 1                      | PCT                          | 0.0017 | 0.002  | 5 | Manual-Congener Group |
| terphenyl 8Cl 2                      | PCT                          | 0.0034 | 0.0034 | 2 | Manual-Congener Group |
| terphenyl 8Cl 3                      | PCT                          | 0.015  | 0.018  | 3 | Manual-Congener Group |
| terphenyl 8Cl 4                      | PCT                          | 0.011  | 0.011  | 3 | Manual-Congener Group |
| terphenyl 8Cl 5                      | PCT                          | 0.0029 | 0.0025 | 3 | Manual-Congener Group |
| pyrrolidinecarbonyl chloride         | Pyrrolidinecarbonyl chloride | 0.047  | 0.034  | 3 | Reference Database MS |
| TCPM 1                               | TCPM                         | 0.12   | 0.095  | 8 | Authentic MS          |
| TCPM 2                               | TCPM                         | 0.12   | 0.12   | 1 | Authentic MS          |
| TCPM 2Cl                             | TCPM                         | 0.022  | 0.014  | 7 | Manual-Congener Group |
| TCPM 3                               | TCPM                         | 2.1    | 1.8    | 8 | Authentic MS          |
| TCPM 4                               | TCPM                         | 0.7    | 0.66   | 8 | Authentic MS          |
| TCPM 4Cl 1                           | TCPM                         | 0.1    | 0.055  | 7 | Manual-Congener Group |
| TCPM 4Cl 2                           | TCPM                         | 0.063  | 0.032  | 6 | Manual-Congener Group |
| TCPM 4Cl 3                           | TCPM                         | 0.046  | 0.054  | 6 | Manual-Congener Group |
| TCPM 5                               | TCPM                         | 5.3    | 3.6    | 8 | Authentic MS          |
| TCPM 6                               | TCPM                         | 1.1    | 1.2    | 7 | Authentic MS          |
| TCPM 7                               | TCPM                         | 0.33   | 0.38   | 5 | Authentic MS          |
| Tris(4-chlorophenyl)methane (TCPM)   | TCPM                         | 8.1    | 7.7    | 8 | Authentic MS RT       |
| Tris(4-chlorophenyl)methanol (TCPME) | TCPMOH                       | 18     | 13     | 6 | Authentic MS RT       |
| toxaphene 1                          | Toxaphene                    | 0.41   | 0.36   | 5 | Manual                |
| toxaphene 10                         | Toxaphene                    | 1.1    | 0.86   | 7 | Authentic MS RT       |
| toxaphene 11                         | Toxaphene                    | 0.13   | 0.13   | 6 | Authentic MS RT       |
| toxaphene 12                         | Toxaphene                    | 0.4    | 0.4    | 6 | Manual                |
| toxaphene 13                         | Toxaphene                    | 0.25   | 0.18   | 5 | Manual                |
| toxaphene 14                         | Toxaphene                    | 0.12   | 0.081  | 4 | Manual                |
| toxaphene 15                         | Toxaphene                    | 0.28   | 0.24   | 7 | Manual                |
| toxaphene 16                         | Toxaphene                    | 0.27   | 0.27   | 8 | Authentic MS RT       |

|                |                      |        |        |   |                       |
|----------------|----------------------|--------|--------|---|-----------------------|
| toxaphene 17   | Toxaphene            | 0.44   | 0.49   | 8 | Authentic MS RT       |
| toxaphene 18   | Toxaphene            | 0.0077 | 0.0092 | 3 | Authentic MS          |
| toxaphene 19   | Toxaphene            | 0.026  | 0.026  | 5 | Authentic MS          |
| toxaphene 2    | Toxaphene            | 0.06   | 0.065  | 3 | Authentic MS RT       |
| toxaphene 3    | Toxaphene            | 0.017  | 0.016  | 5 | Authentic MS RT       |
| toxaphene 4    | Toxaphene            | 0.013  | 0.013  | 2 | Authentic MS RT       |
| toxaphene 5    | Toxaphene            | 0.027  | 0.024  | 5 | Manual                |
| toxaphene 6    | Toxaphene            | 0.08   | 0.065  | 3 | Manual                |
| toxaphene 7    | Toxaphene            | 0.009  | 0.0076 | 4 | Manual                |
| toxaphene 8    | Toxaphene            | 0.072  | 0.071  | 4 | Manual                |
| toxaphene 9    | Toxaphene            | 0.054  | 0.054  | 2 | Reference Database MS |
| benzotrile 3Cl | Trichloro benzotrile | 0.73   | 0.75   | 4 | N/A                   |
| unknown-10     | Unknown              | 0.025  | 0.025  | 1 | N/A                   |
| unknown-11     | Unknown              | 0.05   | 0.052  | 6 | N/A                   |
| unknown-12     | Unknown              | 0.02   | 0.02   | 1 | N/A                   |
| unknown-13     | Unknown              | 0.036  | 0.038  | 6 | N/A                   |
| unknown-14     | Unknown              | 0.14   | 0.14   | 1 | N/A                   |
| unknown-15     | Unknown              | 0.018  | 0.017  | 8 | N/A                   |
| unknown-16     | Unknown              | 0.023  | 0.023  | 3 | N/A                   |
| unknown-17     | Unknown              | 0.026  | 0.024  | 5 | N/A                   |
| unknown-18     | Unknown              | 0.061  | 0.049  | 4 | N/A                   |
| unknown-19     | Unknown              | 0.071  | 0.061  | 3 | N/A                   |
| unknown-20     | Unknown              | 0.01   | 0.0053 | 4 | N/A                   |
| unknown-21     | Unknown              | 0.11   | 0.035  | 3 | N/A                   |
| unknown-22     | Unknown              | 0.098  | 0.064  | 8 | N/A                   |
| unknown-23     | Unknown              | 0.017  | 0.017  | 1 | N/A                   |
| unknown-24     | Unknown              | 0.0025 | 0.0025 | 1 | N/A                   |
| unknown-25     | Unknown              | 0.013  | 0.013  | 2 | N/A                   |
| unknown-26     | Unknown              | 0.17   | 0.17   | 2 | N/A                   |
| unknown-27     | Unknown              | 0.004  | 0.004  | 1 | N/A                   |
| unknown-28     | Unknown              | 0.011  | 0.011  | 2 | N/A                   |
| unknown-29     | Unknown              | 0.0083 | 0.0083 | 2 | N/A                   |

|             |           |         |         |   |     |
|-------------|-----------|---------|---------|---|-----|
| unknown-30  | Unknown   | 0.0068  | 0.0068  | 4 | N/A |
| unknown-31  | Unknown   | 0.0039  | 0.0039  | 2 | N/A |
| unknown-32  | Unknown   | 0.014   | 0.0071  | 3 | N/A |
| unknown-33  | Unknown   | 0.015   | 0.015   | 4 | N/A |
| unknown-34  | Unknown   | 0.014   | 0.0062  | 4 | N/A |
| unknown-35  | Unknown   | 0.069   | 0.069   | 1 | N/A |
| unknown-36  | Unknown   | 0.012   | 0.008   | 6 | N/A |
| unknown-37  | Unknown   | 0.0087  | 0.0064  | 4 | N/A |
| unknown-38  | Unknown   | 0.0058  | 0.0064  | 4 | N/A |
| unknown-39  | Unknown   | 0.0057  | 0.0023  | 3 | N/A |
| unknown-40  | Unknown   | 0.0042  | 0.0037  | 3 | N/A |
| unknown-41  | Unknown   | 0.0026  | 0.002   | 4 | N/A |
| unknown-42  | Unknown   | 0.016   | 0.012   | 7 | N/A |
| unknown-43  | Unknown   | 0.14    | 0.11    | 5 | N/A |
| unknown-44  | Unknown   | 0.007   | 0.0044  | 4 | N/A |
| unknown-45  | Unknown   | 0.011   | 0.011   | 3 | N/A |
| unknown-46  | Unknown   | 0.0054  | 0.0056  | 4 | N/A |
| unknown-47  | Unknown   | 0.035   | 0.029   | 8 | N/A |
| unknown-48  | Unknown   | 0.00022 | 0.00022 | 1 | N/A |
| unknown-49  | Unknown   | 0.052   | 0.029   | 5 | N/A |
| unknown-50  | Unknown   | 0.0089  | 0.0063  | 7 | N/A |
| unknown-51  | Unknown   | 0.025   | 0.025   | 1 | N/A |
| unknown-52  | Unknown   | 0.046   | 0.037   | 8 | N/A |
| unknown-53  | Unknown   | 0.0035  | 0.0029  | 4 | N/A |
| unknown-54  | Unknown   | 0.0048  | 0.0046  | 3 | N/A |
| unknown-55  | Unknown   | 0.0094  | 0.0079  | 3 | N/A |
| unknown-56  | Unknown   | 0.0087  | 0.01    | 3 | N/A |
| unknown-9   | Unknown   | 0.0025  | 0.0025  | 1 | N/A |
| unknown-1-1 | Unknown-1 | 0.11    | 0.11    | 1 | N/A |
| unknown-1-2 | Unknown-1 | 0.076   | 0.076   | 1 | N/A |
| unknown-1-3 | Unknown-1 | 0.0022  | 0.0013  | 3 | N/A |
| unknown-1-4 | Unknown-1 | 0.016   | 0.012   | 6 | N/A |
| unknown-1-5 | Unknown-1 | 0.054   | 0.045   | 7 | N/A |

|              |           |        |        |   |              |
|--------------|-----------|--------|--------|---|--------------|
| unknown-1-6  | Unknown-1 | 0.0043 | 0.0043 | 2 | N/A          |
| unknown-2-1  | Unknown-2 | 1.3    | 1.3    | 8 | N/A          |
| unknown-2-10 | Unknown-2 | 0.084  | 0.081  | 8 | N/A          |
| unknown-2-11 | Unknown-2 | 0.015  | 0.01   | 4 | N/A          |
| unknown-2-2  | Unknown-2 | 0.14   | 0.14   | 6 | Authentic MS |
| unknown-2-3  | Unknown-2 | 2      | 1.2    | 8 | Authentic MS |
| unknown-2-4  | Unknown-2 | 0.81   | 0.53   | 7 | Authentic MS |
| unknown-2-5  | Unknown-2 | 0.05   | 0.029  | 6 | N/A          |
| unknown-2-6  | Unknown-2 | 0.031  | 0.027  | 3 | N/A          |
| unknown-2-7  | Unknown-2 | 0.18   | 0.18   | 2 | Authentic MS |
| unknown-2-8  | Unknown-2 | 0.2    | 0.17   | 7 | N/A          |
| unknown-2-9  | Unknown-2 | 0.23   | 0.15   | 6 | N/A          |
| unknown-3-1  | Unknown-3 | 0.029  | 0.025  | 8 | N/A          |
| unknown-3-2  | Unknown-3 | 0.0047 | 0.0042 | 4 | N/A          |
| unknown-3-3  | Unknown-3 | 0.0087 | 0.0076 | 7 | N/A          |
| unknown-4-1  | Unknown-4 | 0.032  | 0.031  | 5 | N/A          |
| unknown-4-10 | Unknown-4 | 0.11   | 0.095  | 8 | N/A          |
| unknown-4-11 | Unknown-4 | 0.078  | 0.052  | 7 | N/A          |
| unknown-4-12 | Unknown-4 | 0.013  | 0.0097 | 5 | N/A          |
| unknown-4-13 | Unknown-4 | 0.054  | 0.034  | 8 | N/A          |
| unknown-4-14 | Unknown-4 | 0.061  | 0.047  | 8 | N/A          |
| unknown-4-15 | Unknown-4 | 0.013  | 0.013  | 4 | N/A          |
| unknown-4-16 | Unknown-4 | 0.035  | 0.02   | 8 | N/A          |
| unknown-4-17 | Unknown-4 | 0.016  | 0.011  | 6 | N/A          |
| unknown-4-2  | Unknown-4 | 0.079  | 0.067  | 8 | N/A          |
| unknown-4-3  | Unknown-4 | 0.28   | 0.27   | 8 | N/A          |
| unknown-4-4  | Unknown-4 | 0.16   | 0.17   | 7 | N/A          |
| unknown-4-5  | Unknown-4 | 0.091  | 0.087  | 6 | N/A          |
| unknown-4-6  | Unknown-4 | 0.091  | 0.073  | 5 | N/A          |
| unknown-4-7  | Unknown-4 | 0.065  | 0.077  | 5 | N/A          |
| unknown-4-8  | Unknown-4 | 0.19   | 0.15   | 4 | N/A          |
| unknown-4-9  | Unknown-4 | 0.038  | 0.037  | 5 | N/A          |

|             |           |        |        |   |     |
|-------------|-----------|--------|--------|---|-----|
| unknown-5-1 | Unknown-5 | 0.012  | 0.012  | 2 | N/A |
| unknown-5-2 | Unknown-5 | 0.093  | 0.09   | 7 | N/A |
| unknown-6-1 | Unknown-6 | 0.056  | 0.028  | 5 | N/A |
| unknown-6-2 | Unknown-6 | 0.0096 | 0.0039 | 6 | N/A |
| unknown-6-3 | Unknown-6 | 0.012  | 0.0073 | 5 | N/A |
| unknown-7-1 | Unknown-7 | 0.031  | 0.018  | 7 | N/A |
| unknown-7-2 | Unknown-7 | 0.07   | 0.027  | 8 | N/A |
| unknown-8-1 | Unknown-8 | 0.04   | 0.029  | 5 | N/A |
| unknown-8-2 | Unknown-8 | 1.3    | 1.3    | 8 | N/A |

**Table S2.** K-means clustering results for the anthropogenic compounds.

| <b>Blubber Sample</b> | <b>Cluster</b> |
|-----------------------|----------------|
| offshore (D2)         | 1              |
| coastal (D3)          | 1              |
| coastal (D8)          | 1              |
| offshore (D4)         | 2              |
| coastal (D5)          | 2              |
| offshore (D6)         | 2              |
| offshore (D7)         | 2              |
| coastal (D1)          | 2              |

**Table S3.** K-means clustering results for the natural compounds.

| <b>Blubber Sample</b> | <b>Cluster</b> |
|-----------------------|----------------|
| offshore (D2)         | 1              |
| offshore (D4)         | 1              |
| offshore (D6)         | 1              |
| offshore (D7)         | 1              |
| coastal (D1)          | 2              |
| coastal (D3)          | 2              |
| coastal (D5)          | 2              |
| coastal (D8)          | 2              |

**Table S4.** K-means clustering results for the unknown compounds.

| <b>Blubber Sample</b> | <b>Cluster</b> |
|-----------------------|----------------|
| offshore (D4)         | 1              |
| coastal (D5)          | 1              |
| coastal (D3)          | 2              |
| coastal (D8)          | 2              |
| offshore (D6)         | 2              |
| offshore (D7)         | 2              |
| coastal (D1)          | 2              |
| offshore (D2)         | 2              |



**Table S5.** Stranding and morphometric information for the Southern California *Tursiops truncatus* blubber samples (n=8).

| Blind ID | NOAA Code | Stranding Date | CA Stranding Location                    | Length (cm) | Weight (kg) | Age | Ecotype  |
|----------|-----------|----------------|------------------------------------------|-------------|-------------|-----|----------|
| D1       | KZP0086   | 7/25/01        | Imperial Beach, San Diego                | 310         | n/a         | n/a | Coastal  |
| D2       | DSJ2195   | 2/11/06        | Dockweiler State Beach, Los Angeles      | 263         | 165         | 7   | Offshore |
| D3       | NEB0016   | 8/9/10         | Imperial Beach, San Diego                | 319         | n/a         | 13  | Coastal  |
| D4       | JEH0504   | 7/21/00        | Big Sycamore Canyon State Beach, Ventura | 293         | 331         | 15  | Offshore |
| D5       | JEH0472   | 9/5/95         | Solana Beach, San Diego                  | 313         | 295         | 17  | Coastal  |
| D6       | DSJ2155   | 5/25/04        | Newport Beach                            | 265         | 299         | 13  | Offshore |
| D7       | DSJ1765   | 5/1/97         | Point Dume, Los Angeles                  | 289         | 298         | 11  | Offshore |
| D8       | KXD0003   | 3/24/00        | Coronado, San Diego                      | 305         | n/a         | n/a | Coastal  |
